# Supplementary material for: Cytohesin-3 is required for full insulin receptor signaling and controls body weight via lipid excretion
Source: PubMed Central journal article supplement (PMC6401384; doi:10.1038/s41598-019-40231-3), 2019-03-05

**Cytohesin-3 is required for full insulin receptor signaling and  
controls body weight via lipid excretion**

Bettina Jux, Dominic Gosejacob, Felix Tolksdorf, Christa Mandel, Michael Rieck,

Angrit Namislo, Alexander Pfeifer, Waldemar Kolanus

Supplementary Figure 1

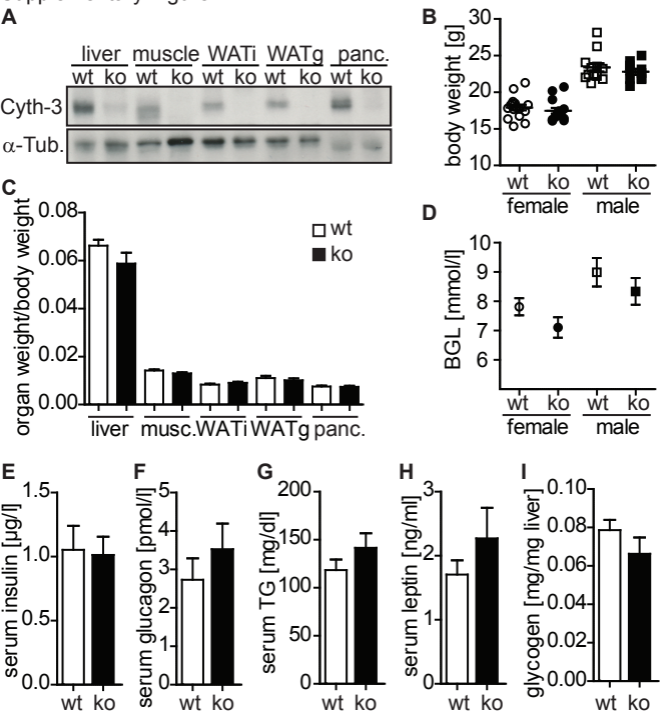

Suppl. Figure 1: Young adult  $cyth3^{-/-}$  mice have a normal metabolic phenotype.

Male and female mice at the age of 7-12 weeks were phenotypically analyzed. A) A representative western blot analysis of the cytohesin-3 protein expression in liver, skeletal muscle, inguinal subcutaneous white adipose tissue (WATi), intra-abdominal gonadal white adipose tissue (WATg) and pancreas (panc.) is shown. Body weight at the age of 8-9 weeks ( $n \geq 10$ ) (B), organ weight normalized to body weight from male mice ( $n = 7-9$ ) (C), blood glucose levels (BGL) in non-fasted mice at the age of 8-9 weeks ( $n \geq 12$ ) (D), serum levels of insulin ( $n = 8$ ) (E), glucagon ( $n = 7$ ) (F), triglycerides (TG;  $n = 5$ ) (G), leptin ( $n = 6$ ) (H) and liver glycogen ( $n = 6$ ) (I) are given from male and female wt (white symbols and bars) and  $cyth3^{-/-}$  (ko, black symbols and bars) mice as bar graphs of means + SEM or as individual data points  $\pm$  SEM.

## Supplementary Figure 2

**A**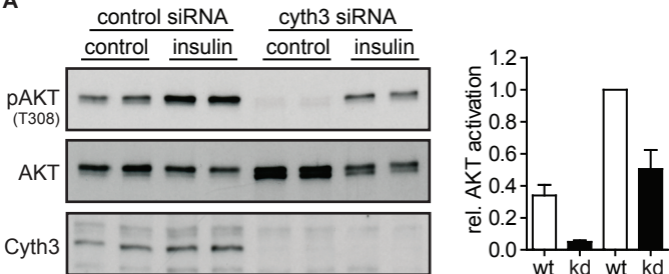**B**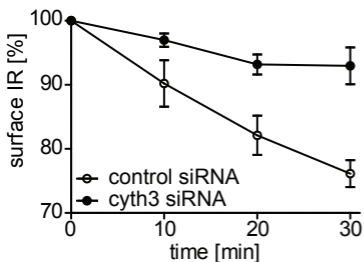

Supplementary Figure 2: IR signaling and internalization in HepG2 cells is impaired after cyth3-knockdown. **A**) Control siRNA (wt) or Cyth3 siRNA (kd) treated HepG2 cells were stimulated with 100nM insulin. Ten minutes later cells were harvested and activation of AKT was determined as a ratio of phosphorylated to total protein levels. Representative Western blot analyses are shown. The activation was normalized to insulin-stimulated wt cells (n = 4). **B**) IR internalization after indicated time points of insulin stimulation was measured by FACS and calculated in comparison to IR surface expression before stimulation (= 100%). Results are given in means  $\pm$  SEM (n = 5).

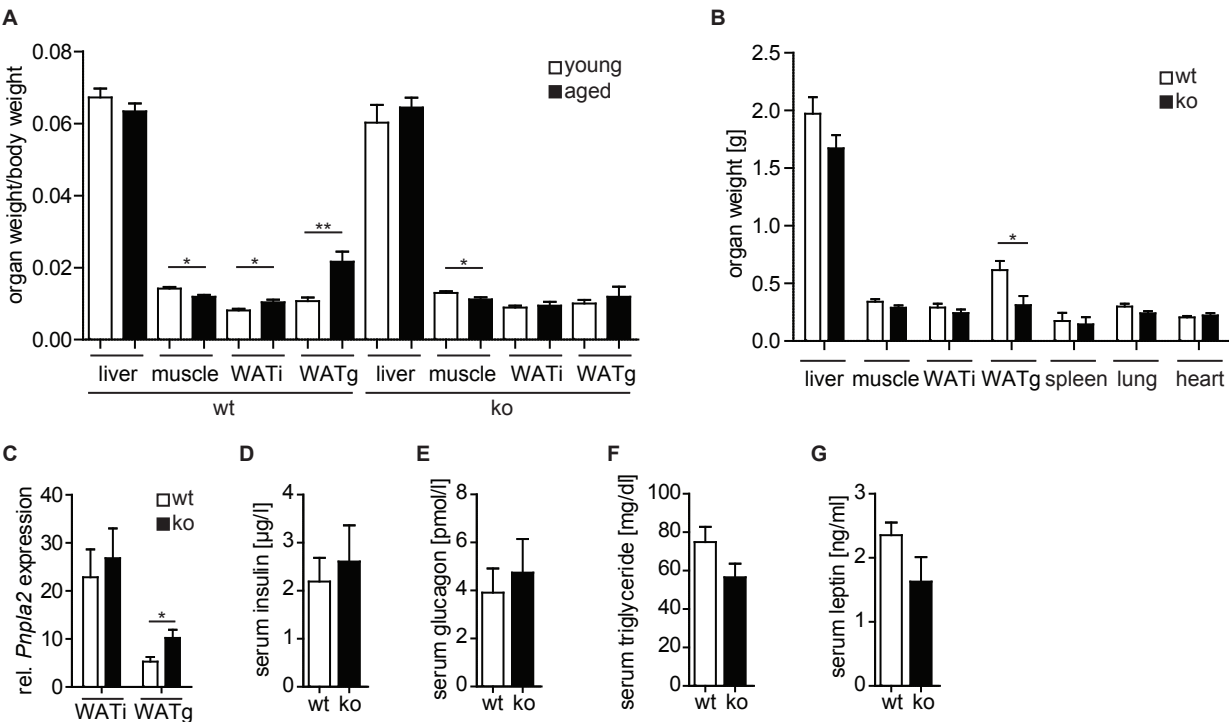

Supplementary Figure 3: Phenotypic analysis of two years old *cyth3<sup>+/+</sup>* (wt) and *cyth3<sup>-/-</sup>* (ko) mice. Comparison of organ weights relative to body weight from young (white bars) and aged mice (black bars) of wt and ko mice ( $n \geq 6$ ) (A). Total organ weights of aged wt (white bars) and ko mice (black bars) ( $n = 6$ ) (B). Expression of *Pnpla2* in adipose tissues was analyzed by PCR. The expression was normalized to *Hprt* ( $n = 5-6$ ) (C). Serum levels of insulin ( $n = 6$ ) (D), glucagon ( $n = 5$ ) (E), triglycerides ( $n = 6$ ) (F), and leptin ( $n = 6$ ) (G) are given from aged wt (white bars) and ko (black bars) mice. Results are given as bar graphs of means + SEM (\*,  $p < 0.05$ ; \*\*,  $p < 0.01$ ).

## Supplementary Figure 4

**A**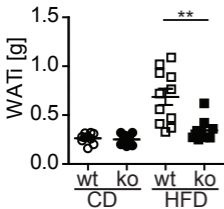**B**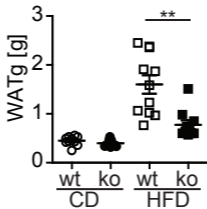

Supplementary Figure 4: Fat pad weight is reduced in HFD-fed *cyth3*<sup>-/-</sup> mice. Inguinal subcutaneous (WATi; **A**) and intra-abdominal gonadal white adipose tissue (WATg; **B**) from wt (white symbols) and ko mice (black symbols) was weighed after 6 weeks of HFD (squares) and CD (circles), respectively. Results are given as individual data points  $\pm$  SEM (\*\*,  $p < 0.01$ ).

## Supplementary Figure 5

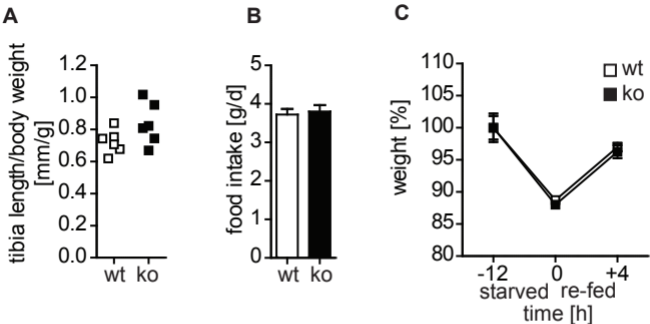

Supplementary Figure 5: Size and food uptake are similar between  $cyth3^{+/+}$  (wt) and  $cyth3^{-/-}$  (ko) mice. **A**) Mouse-size was determined by tibia length in relation to body weight of 8-9 weeks old mice ( $n = 6$ ). **B**) Daily food intake of wt and  $cyth3^{-/-}$  mice ( $n = 6$ ). **C**) Weight loss and gain of wt (white squares) and  $cyth3^{-/-}$  (ko, black squares) mice after a starvation period of 12 hours (-12) and subsequent re-feeding for four hours (+4) ( $n \geq 12$ ) Results are given in means  $\pm$  SEM.

Full western blot images for Figure 1

liver pAKT<sup>T308</sup>  
 wt ko wt ko  
 control insulin

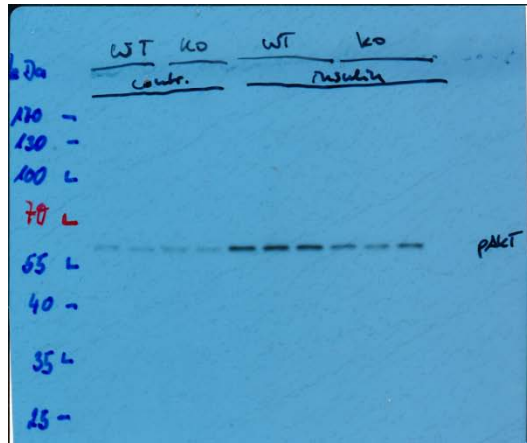

liver tAKT  
 wt ko wt ko  
 control insulin

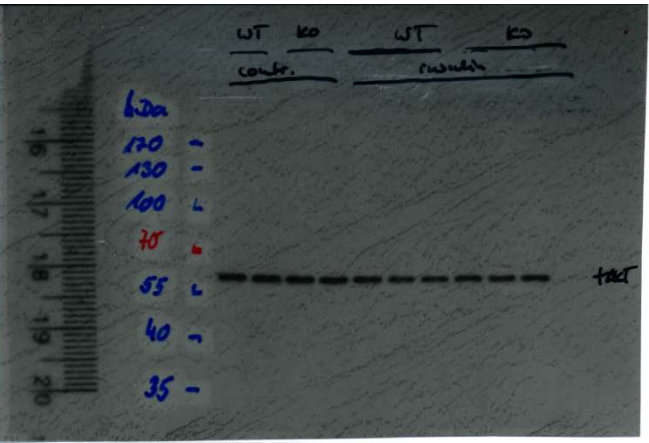

liver pERK<sup>T202/204</sup>  
 wt ko wt ko  
 control insulin

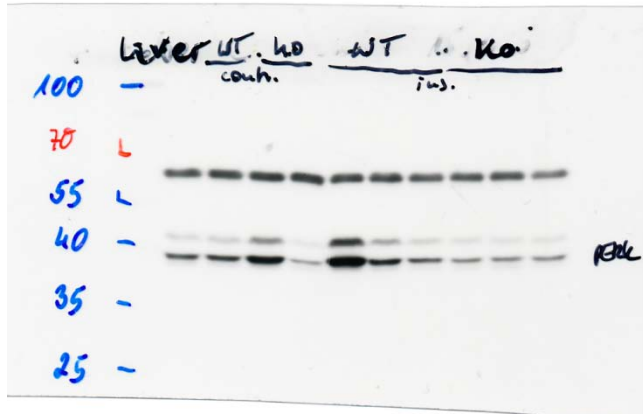

liver tERK  
 wt ko wt ko  
 control insulin

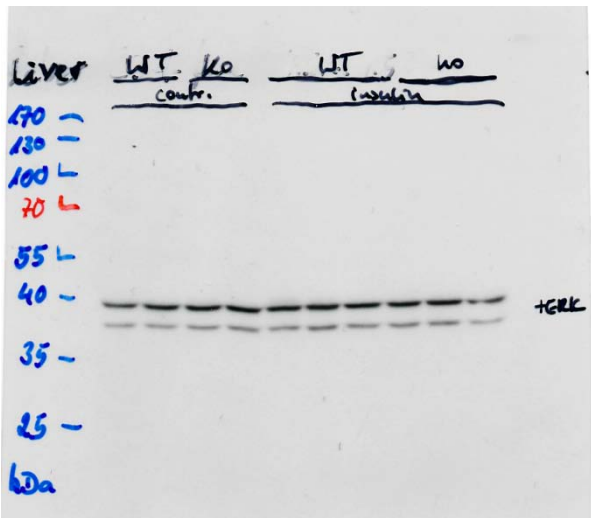

liver pIR<sup>Y1162/3</sup>  
 wt ko wt ko  
 control insulin

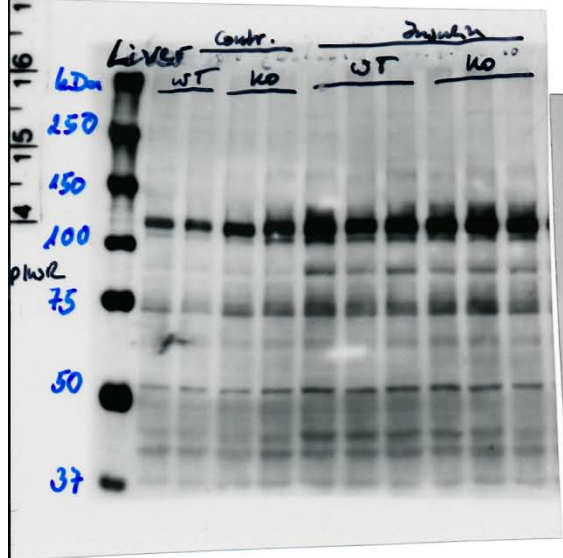

liver tIR  
 wt ko wt ko  
 control insulin

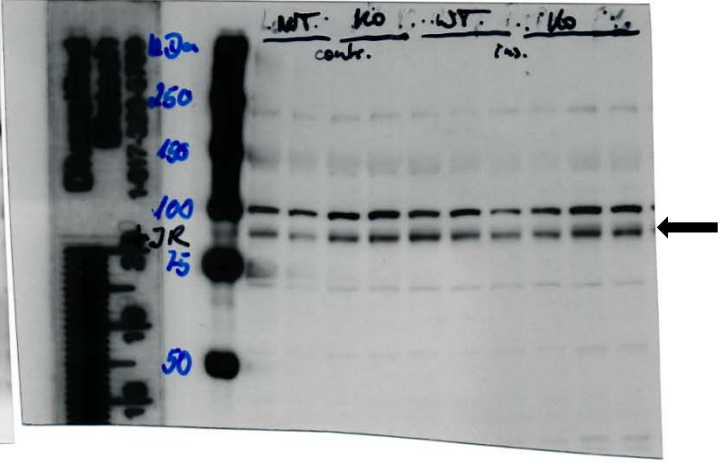

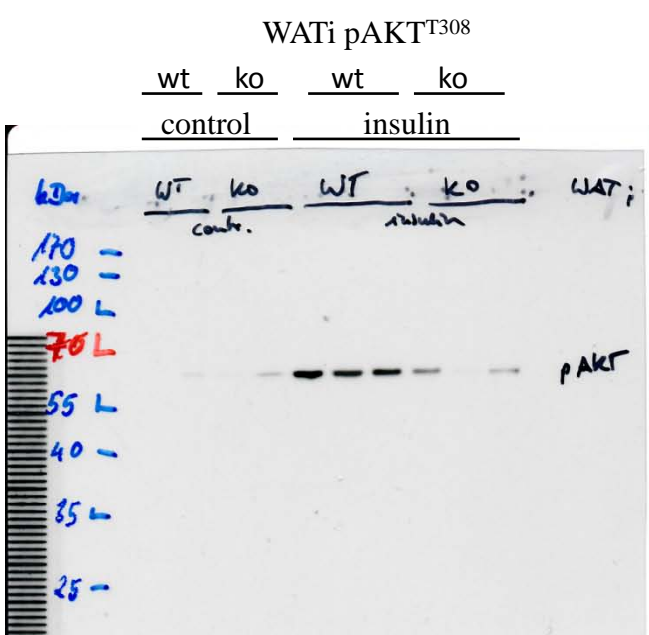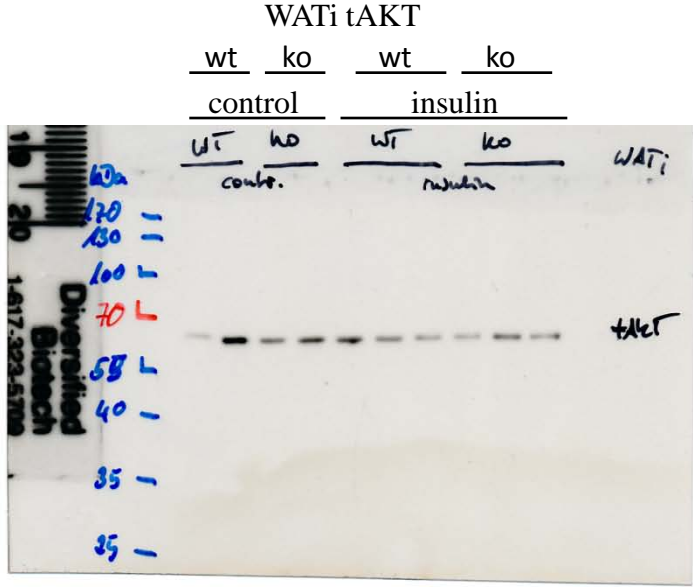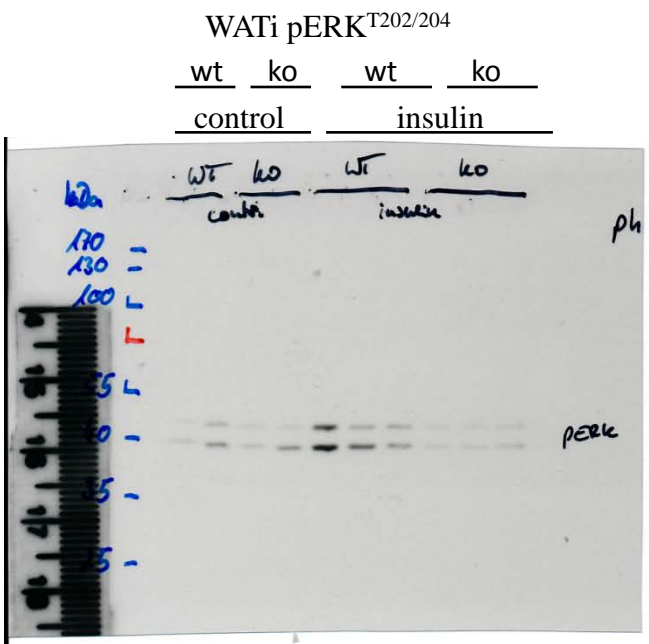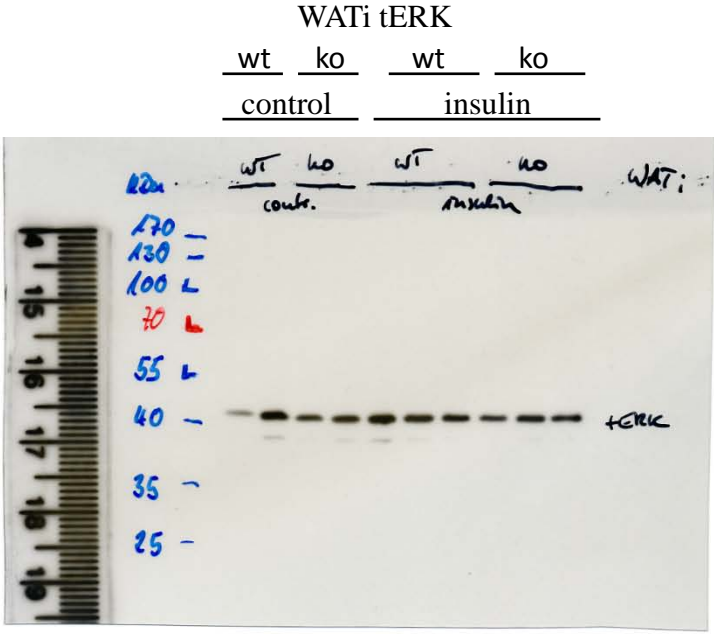



### Cytohesin-3

liver musc. WATi WATg panc.  
wt ko wt ko wt ko wt ko wt ko

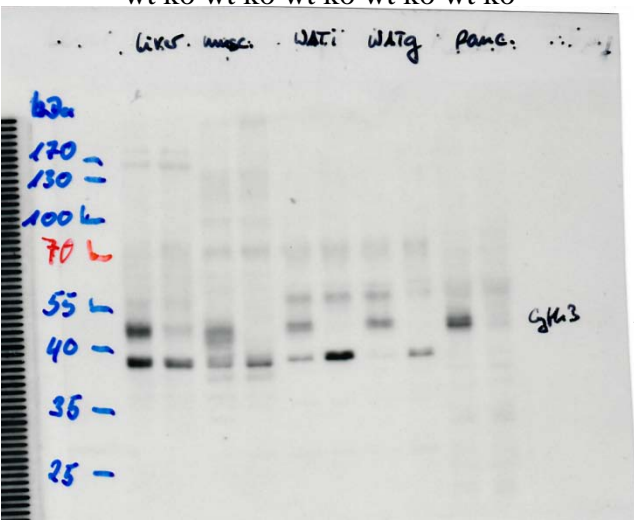

### $\alpha$ -Tubulin

liver musc. WATi WATg panc.  
wt ko wt ko wt ko wt ko wt ko

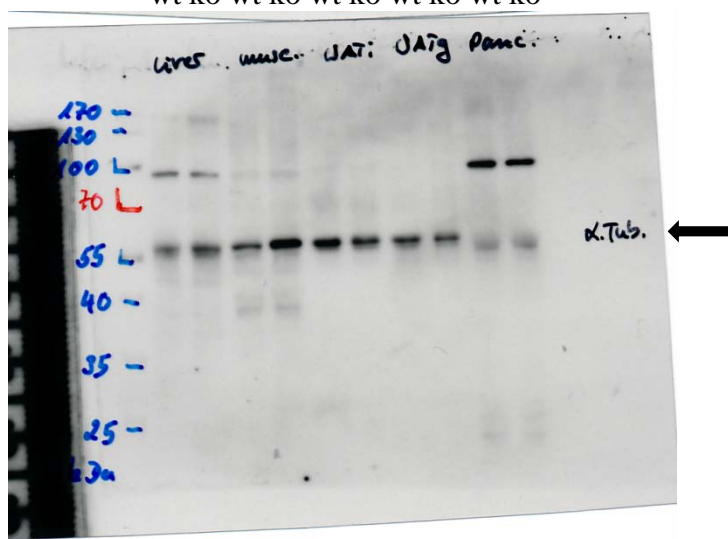

Full western blot images for Supplementary Figure 2

control siRNA    Cyth3 siRNA  
contr. insulin    contr. insulin

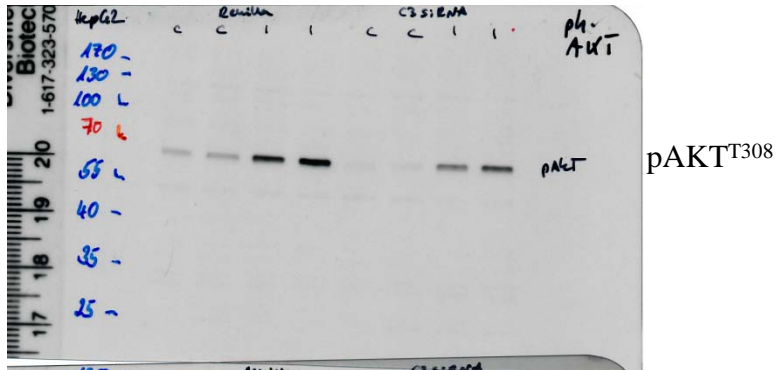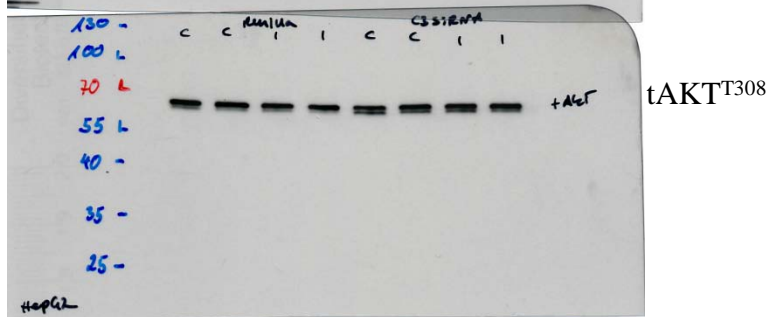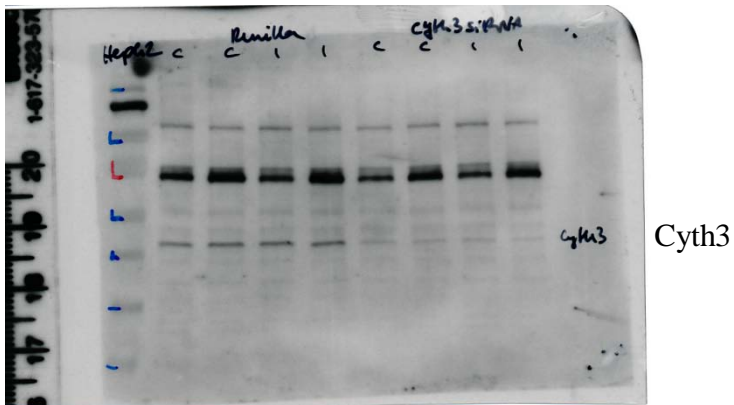

Supplement: 41598_2019_40231_MOESM1_ESM.pdf [file 41598_2019_40231_MOESM1_ESM.pdf]
